# Supplementary material
Source: PubMed Central journal article supplement (PMC1855298)

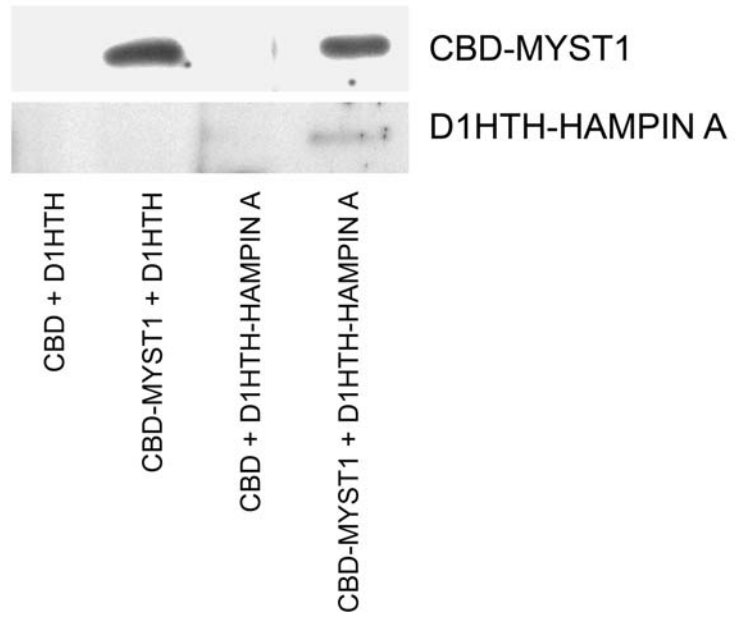

Supplement: NIHMS20194-supplement-Fig118256b.pdf [file NIHMS20194-supplement-Fig118256b.pdf]

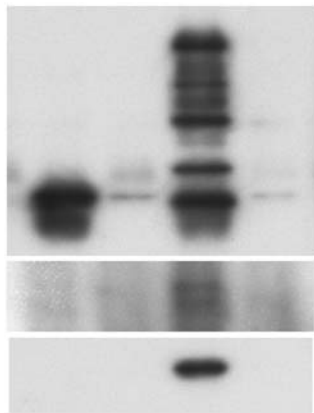

D1HTH-HAMPIN A

D1HTH

NOP17

TTC4

+ - + - **IP**

Supplement: NIHMS20194-supplement-Fig218256c.pdf [file NIHMS20194-supplement-Fig218256c.pdf]

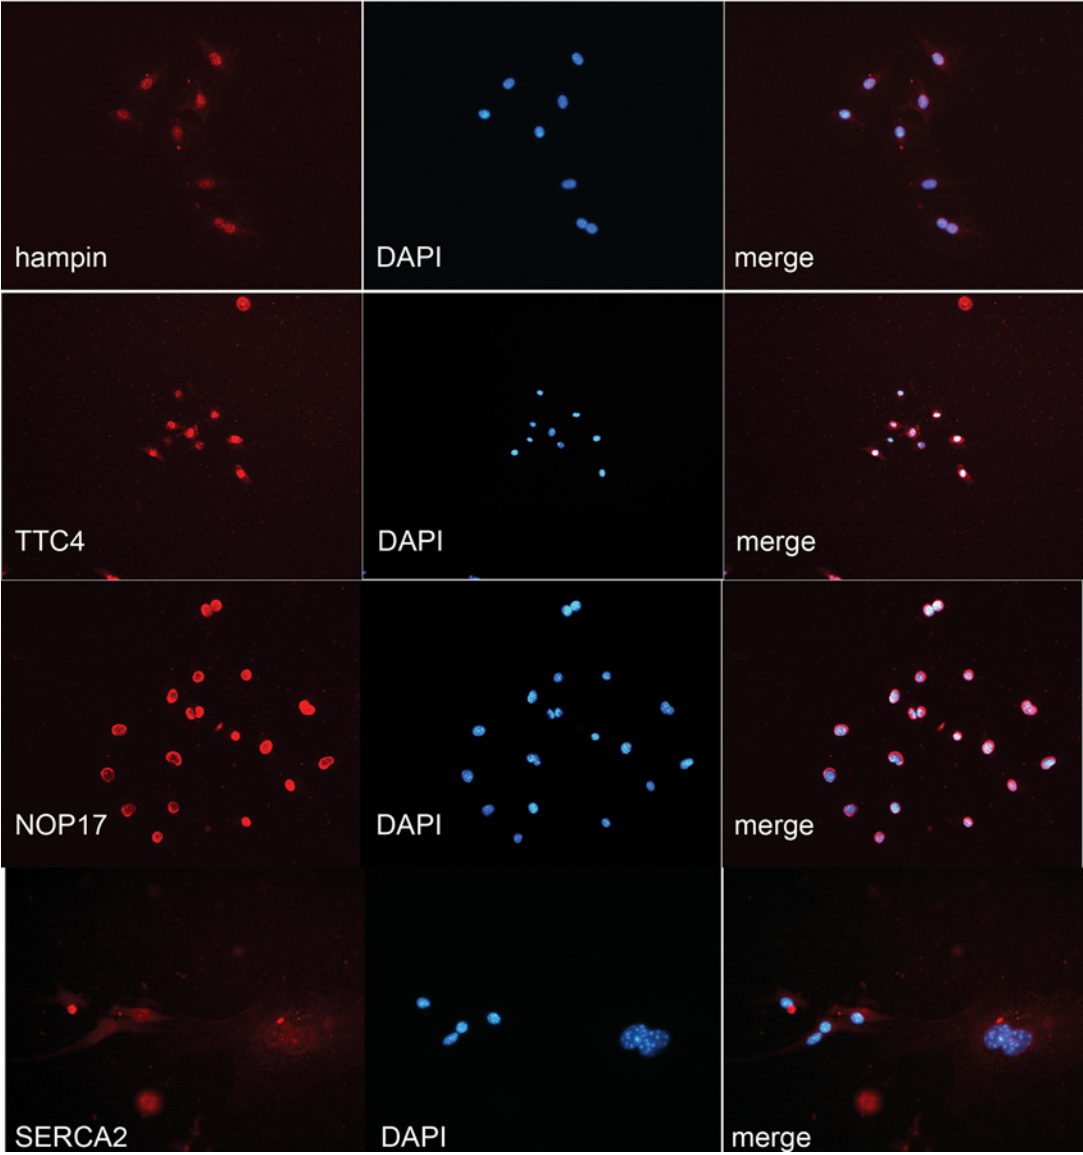

Supplement: NIHMS20194-supplement-Fig318256d.pdf [file NIHMS20194-supplement-Fig318256d.pdf]
